# Supplementary material
Source: publisher figshare collection journal article supplement (https://acs.figshare.com/ndownloader/files/11295944)
Supplement: Supplementary file 1 [file 11295944]

# SUPPORTING INFORMATION

## Scanning bipolar electrochemical microscopy

Vera Eßmann,<sup>a</sup> Carla Santana Santos,<sup>a,b</sup> Tsvetan Tarnev,<sup>a</sup> Mauro Bertotti,<sup>b</sup>

Wolfgang Schuhmann<sup>a,\*</sup>

<sup>a</sup> Analytical Chemistry - Center for Electrochemical Sciences (CES); Ruhr-Universität Bochum, Universitätsstr. 150; 44780 Bochum; Germany

<sup>b</sup> Department of Fundamental Chemistry, Institute of Chemistry, University of São Paulo, Av. Professor Lineu Prestes, 748 05513-970, São Paulo, Brazil

\* Corresponding author: wolfgang.schuhmann@rub.de

### Table of contents

|            |                                                                                                                                           |          |
|------------|-------------------------------------------------------------------------------------------------------------------------------------------|----------|
| Figure S-1 | Bipolar LSVs: $i_{\text{sys}}$ , $I_{\text{ECL}}$ , and $dE_{\text{BE}_a\text{-Sol}}/dE_{\text{BE}_c\text{-Sol}}$ versus $V_{\text{app}}$ | page S-1 |
| Figure S-2 | ECL-based approach of the SBECM tip                                                                                                       | page S-2 |
| Figure S-3 | Photograph of the cathodic pole of the BE array                                                                                           | page S-2 |
| Video S-1  | ECL emissions at the BE <sub>a</sub> s during a line scan                                                                                 | page S-2 |

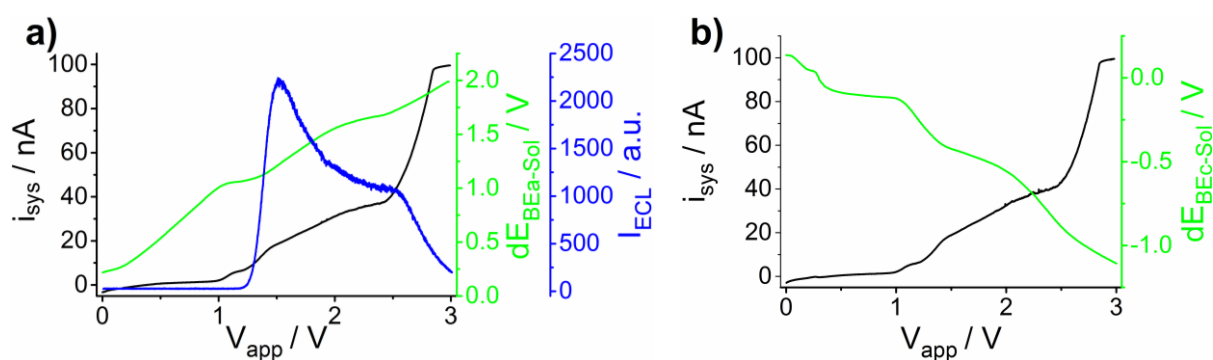

**Figure S-1.** Bipolar LSVs showing a)  $i_{\text{sys}}$  (black),  $I_{\text{ECL}}$  (blue), and  $dE_{\text{BE}_a\text{-Sol}}$  (green) versus  $V_{\text{app}}$  and b)  $i_{\text{sys}}$  (black) and  $dE_{\text{BE}_c\text{-Sol}}$  (green) versus  $V_{\text{app}}$ . For all measurements, a solution of 1 mM  $[\text{Fc}(\text{MeOH})_2]$  and 1 mM  $[\text{Ru}(\text{NH}_3)_6]\text{Cl}_3$  in 0.1 M KCl was used in the cathodic cell (BE<sub>c</sub>: Ø 50 µm Pt-microelectrode), while a solution of 1 mM  $[\text{Ru}(\text{bpy})_3]^{2+}$  and 50 mM TPrA in 0.1 M PBS (pH 7.4) was used in the anodic compartment (BE<sub>a</sub>: Ø 25 µm Pt-microelectrode).

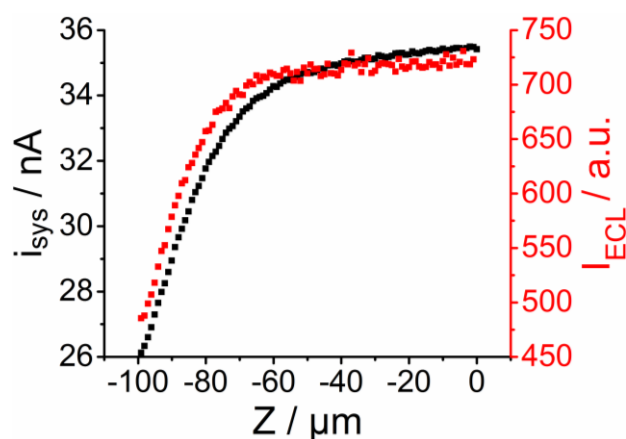

**Figure S-2.** Bipolar approach curve using 1 mM  $[\text{Ru}(\text{NH}_3)_6]\text{Cl}_3$  in 0.1 M KCl solution in the cathodic compartment and a solution of 1 mM  $[\text{Ru}(\text{bpy})_3]^{2+}$  and 50 mM TPrA in 0.1 M PBS (pH 7.4) in the anodic compartment. In the bipolar configuration,  $\text{BE}_c$  was approached to non-conducting bottom of the cathodic chamber while  $i_{\text{sys}}$  (black) and  $I_{\text{ECL}}$  (red) were recorded as indicators of the negative feedback upon approach.  $V_{\text{app}} = 1.6$  V, EM gain = 250.

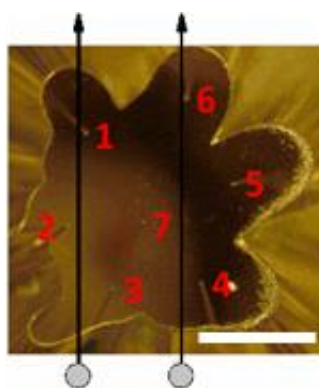

**Figure S-3.** Photograph taken with an optical microscope showing the cathodic poles of the seven BEs. Scale bar: 500  $\mu\text{m}$ .

**Video S-1.** Video of the anodic BE poles of the array during the line scan shown in Figure 2b as recorded with the EMCCD camera (played back with 5 fps, one frame at each x, y-position). A solution of 1 mM  $[\text{Fc}(\text{MeOH})_2]$  in 0.1 M KCl was used in the cathodic compartment, while a solution of 1 mM  $[\text{Ru}(\text{bpy})_3]^{2+}$  and 50 mM TPrA in 0.1 M PBS (pH 7.4) was used in the anodic compartment. Increment: 50  $\mu\text{m}$ ,  $d_{\text{tip-membrane}} = 50$   $\mu\text{m}$ .
